# Supplementary material for: Coupling chemical mutagenesis to next generation sequencing for the identification of drug resistance mutations in Leishmania
Source: PubMed Central journal article supplement (PMC6901541; doi:10.1038/s41467-019-13344-6), 2019-12-09
Supplement: 41467_2019_13344_MOESM1_ESM.pdf [file 41467_2019_13344_MOESM1_ESM.pdf]

**Supplementary Figures and Tables to:**

**Coupling Chemical Mutagenesis to Next Generation Sequencing for the identification of drug resistance mutations**

Bhattacharya, A., et al.

## Supplementary Figures

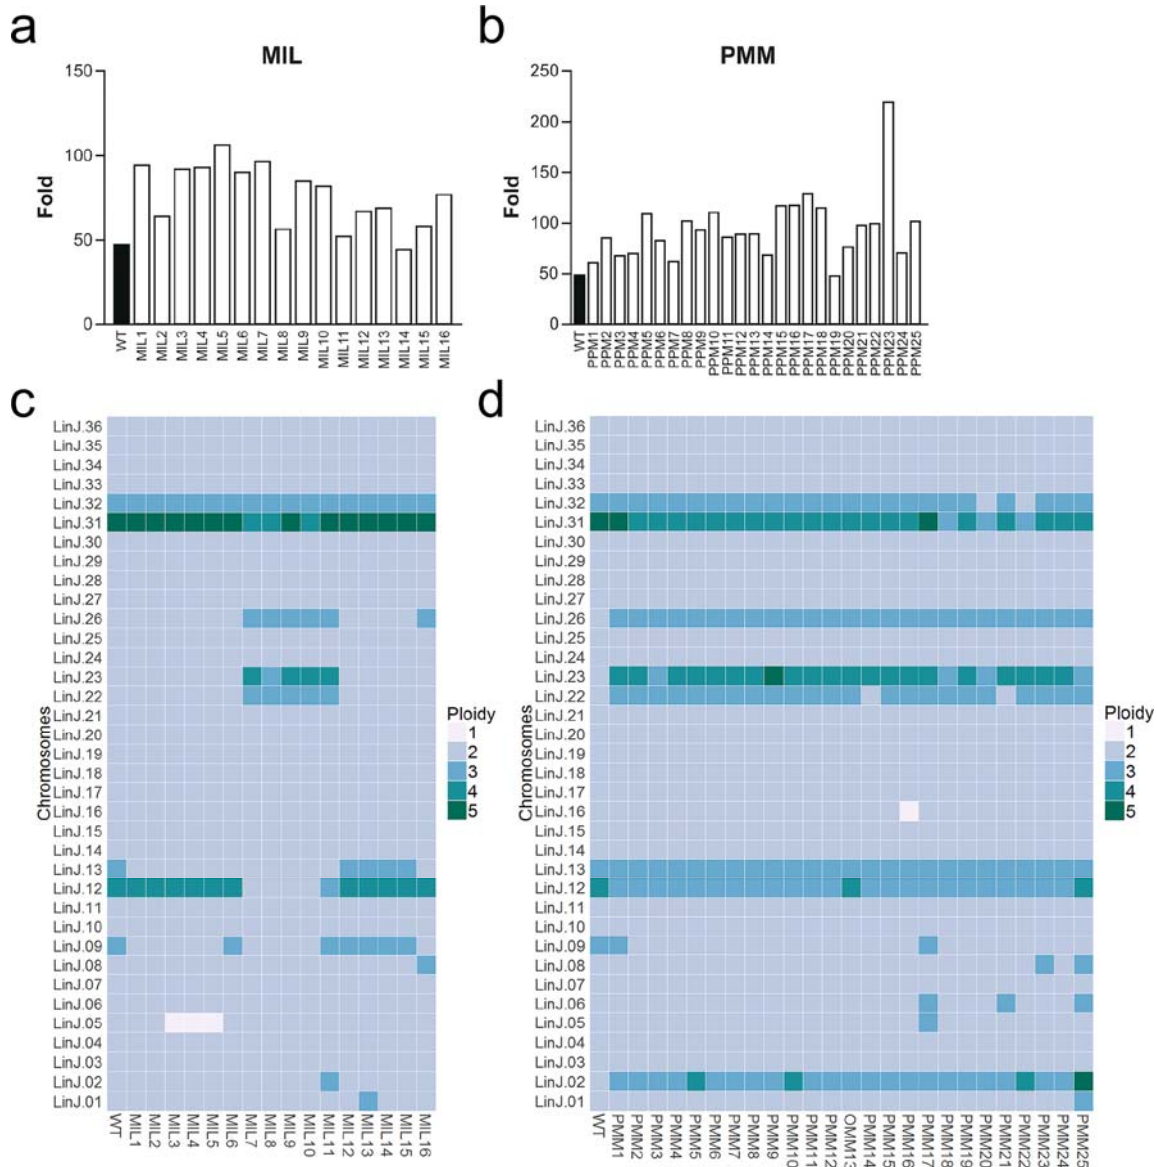

Supplementary Figure 1. **Genomic coverage and changes in ploidy in drug resistant *Leishmania*.** Average fold genomic coverage for wild-type and mutants resistant to MIL (a) and PMM (b) is plotted. Chromosome ploidy in wild-type and mutants resistant to MIL (c) and PMM (d). We calculated the ratio between median FPKM values for individual chromosomes and whole genome for each strain. Source data are provided as a Source Data file.

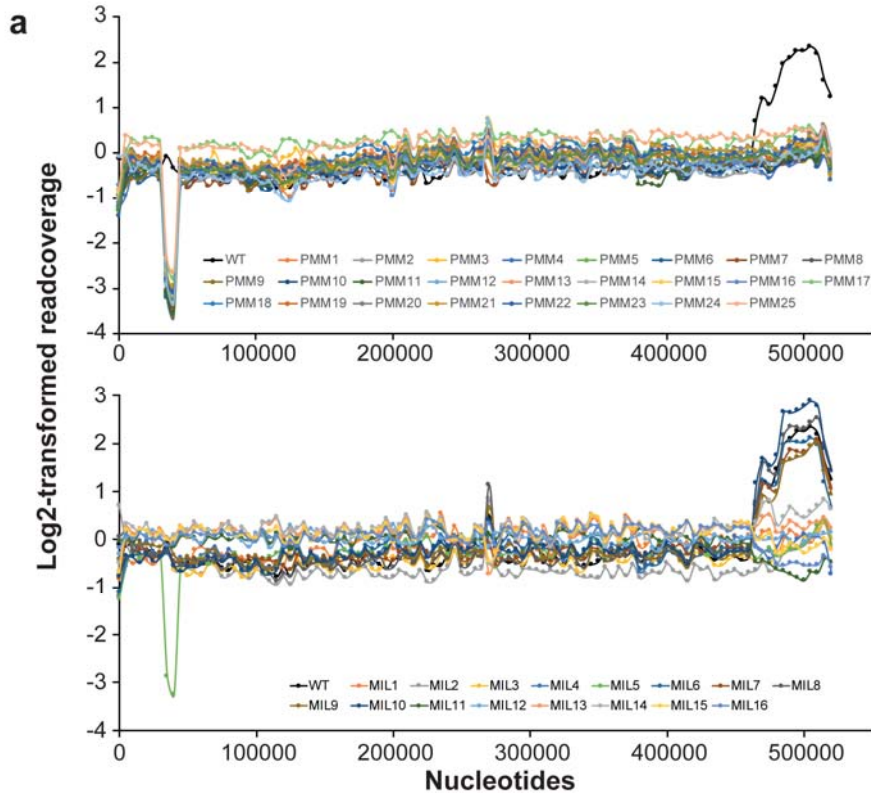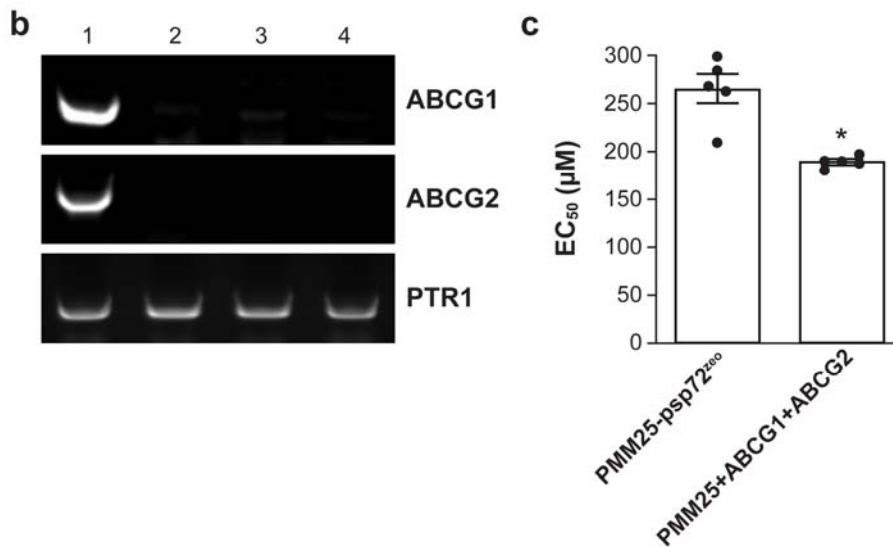

Supplementary Figure 2. **Deletion of a specific locus in chromosome 6 of paromomycin resistant *Leishmania*.** **a**, CNV for chromosome 6 as derived from read depth coverage of uniquely mapped reads along small non-overlapping genomic windows (5 kb) for PMM mutants (top) and MIL mutants (bottom). Read counts were log<sub>2</sub>-

transformed and normalized to the total number of uniquely-mapped reads for each strain. A deletion of 35-40 kb was predicted in every PMM-resistant mutants (and in the MIL5 mutant), but not for the wild-type clone (black circles) used for initiating chemical mutagenesis. **b**, The deletion was confirmed by PCR amplification of *ABCG1* and *ABCG2*, two genes encoded in the deleted locus. Wild-type (1), PMM5 (2), PMM16 (3) and PMM25 (4). The *PTR1* gene was amplified as a positive control. **c**, The genes *ABCG1* and *ABCG2* were episomally expressed from the psp72 $\alpha$ ZEO $\alpha$  plasmid in PMM25 and found to confer a modest sensitization to paromomycin in that mutant. The mutant was also transfected with empty psp72 $\alpha$ ZEO $\alpha$  (PMM25-psp72 $\alpha$ ZEO $\alpha$ ) as a control. Data are mean  $\pm$  SEM for n=5 independent biological replicates. Statistical analyses were performed using unpaired two-tailed t-tests. \*P < 0.05. Source data are provided as a Source Data file.

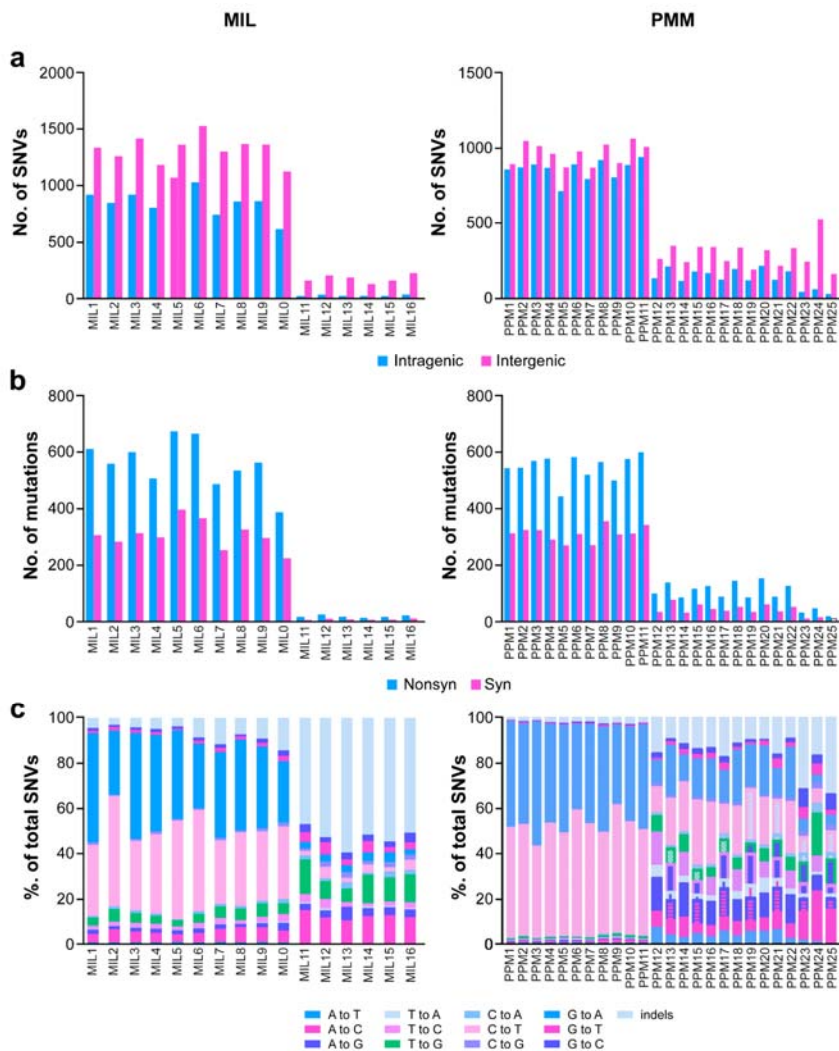

Supplementary Figure 3. **Mutation type in drug resistant *Leishmania* following chemical mutagenesis.** **a**, Number of intragenic and intergenic SNVs detected in *L. infantum* mutants resistant to MIL (left panel) and PMM (right panel) compared to the wild-type parent clone. **b**, Number of synonymous and non-synonymous mutations detected for intragenic SNVs across mutants selected against MIL (left panel) and PMM (right panel). Bar colours represents the type of mutations detected. **c**, Depiction of base specific variation profile for SNVs in each individual mutant clones. Bar colours reflect the type of variation determined. Source data are provided as a Source Data file.

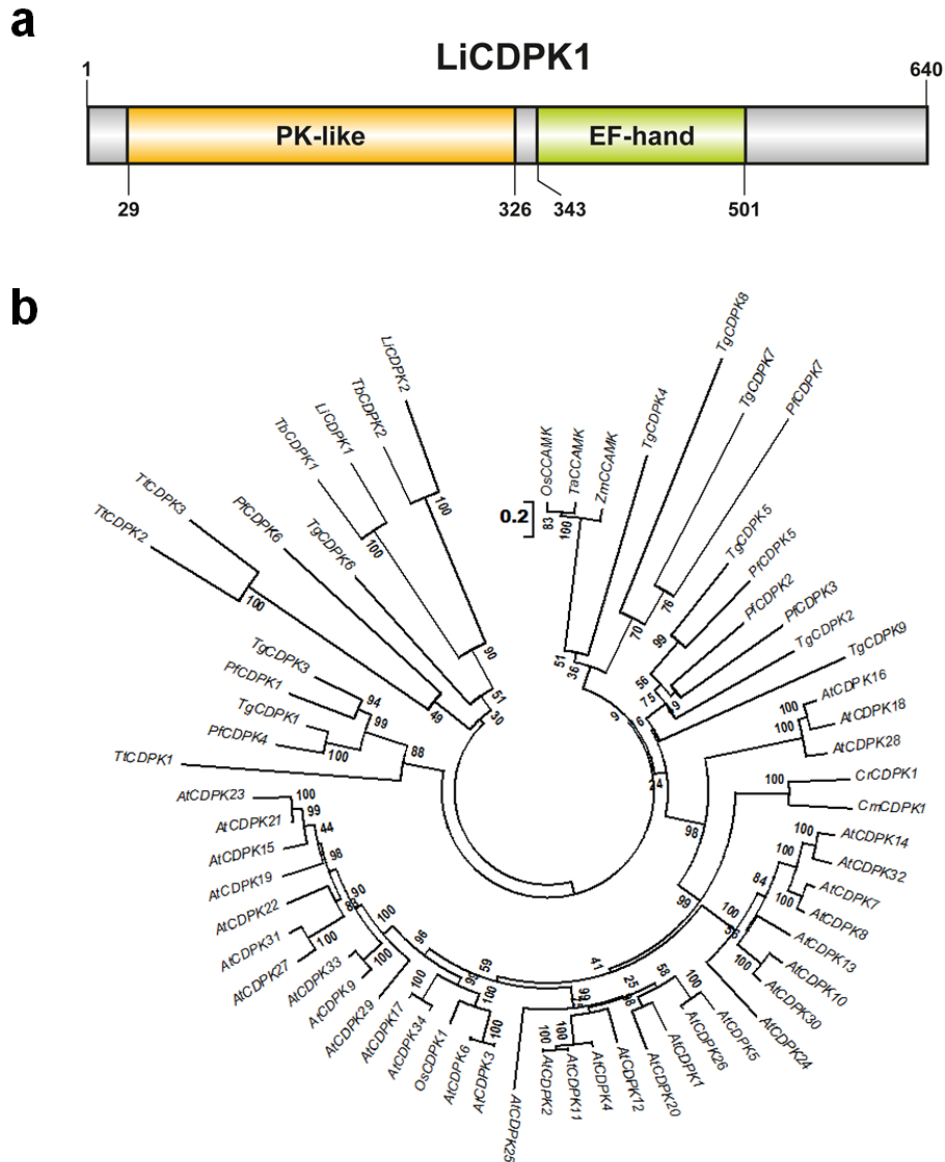

Supplementary Figure 4. **CDPK1 and CDPK1 mutations.** **a**, CDPK1 is presented with its protein kinase (PK-like) and  $\text{Ca}^{2+}$ -binding (EF-hand) domains. The PK-like domain was determined to resemble AMPK/CaMK superfamily by conserved domain (CD)-search (NCBI). **b**, Phylogenetic analysis of direct calcium binding kinases (CDPK and CCAMK). Sixty-three sequences of the kinase category orthologues comprising representatives of various domains of life were analyzed by CLUSTAL $\Omega$ . A Newik phylogenetic tree was constructed for the alignment with *MEGA6* by Neighbour-Joining method with 10000

bootstraps, computed by JTT analysis. Bootstrap values are depicted at each branch node depicting the evolutionary proximity of the proteins. OS: *Oryza sativa* (OsCCAMK: Q6AVM3.1 and OsCDPK1: XP\_015650814.1); Ta: *Triticumaestivum* (TaCCAMK: ADK22086.1); Zm: *Zia maize* (ZmCCAMK: NP\_001105906.1); Cr: *Chlamydomonasreinhardtii* (CrCDPK1: XP\_001691570.1); Cm: *Chlamydomonas moewusii* (CmCDPK1: CAA89202.1); At: *Arabidopsis thaliana* (AtCDPK1: NP\_196107.1; AtCDPK2: NP\_174807.1; AtCDPK3: Q42479.1; AtCDPK4: NP\_192695.1; AtCDPK5: AEE86498.1; AtCDPK6: NP\_194096.1; AtCDPK7: NP\_568281.1; AtCDPK8: Q42438.1; AtCDPK9: Q38868.1; AtCDPK10: Q9M9V8.1; AtCDPK11: Q39016.2; AtCDPK12: Q42396.1; AtCDPK13: AEE78852.1; AtCDPK14: NP\_181717.3; AtCDPK15: NP\_001190794.1; AtCDPK16: NP\_179379.1; AtCDPK17: NP\_196779.1; AtCDPK18: NP\_001190932.1; AtCDPK19: NP\_176386.2; AtCDPK20: NP\_181425.1; AtCDPK21: AEE82416.1; AtCDPK22: Q9ZSA3.2; AtCDPK23: AEE82419.1; AtCDPK23: NP\_001190672.1; AtCDPK24 NP\_180708.1; AtCDPK25: AEC09174.1; AtCDPK26: NP\_001190950.1; AtCDPK27: NP\_192379.2; AtCDPK28: NP\_851280.1; AtCDPK29: NP\_974150.2; AtCDPK30: NP\_177612.2; AtCDPK31: NP\_680596.2; AtCDPK32: NP\_191312.2; AtCDPK33: NP\_175485.1; AtCDPK34: NP\_197437.1); Pf: *Plasmodium falciparum* (PfCDPK1: PKC46465.1; PfCDPK2: PKC43076.1; PfCDPK3: PKC45344.1; PfCDPK4: PKC42240.1; PfCDPK5: PKC47007.1; PfCDPK6: PKC49223.1; PfCDPK7: PKC49078.1); Tg: *Toxoplasma gondii* (TgCDPK1: EPT31305.1; TgCDPK2: EPT27057.1; TgCDPK3: EPT27420.1; TgCDPK4: XP\_018637922.1; TgCDPK5: EPT26997.1; TgCDPK6: EPT24667.1; TgCDPK7: KFH12789.1; TgCDPK8: KFH12687.1; TgCDPK9: EPT24739.1); Tt: *Tetrahymena thermophile* (TtCDPK1 (kinase domain protein):

XP\_001008217.1, TtCDPK2 (kinase domain protein): XP\_001025095.2 and TtCDPK3 (S/T kinase domain protein): XP\_001026079.2); Tb: *Trypanosoma brucei* (TbCDPK1: Tb927.2.1820 and TbCDPK2: Tb927.10.3900); Li: *Leishmania infantum* (LiCDPK1: LinJ.33.1810 and LiCDPK2: LinJ.35.0480).



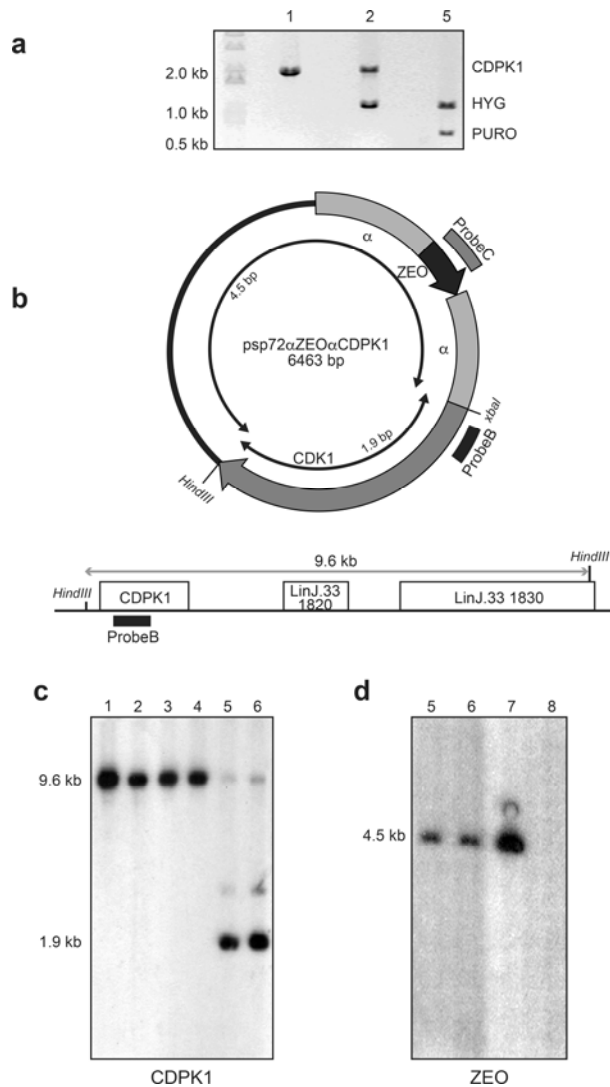

Supplementary Figure 5. **Curing of episomal CDPK1 from CDPK1<sup>H/P</sup>.** **a**, PCR analyses of DNAs of *Leishmania* lines inactivated for CDPK1. PCR primers are described in Fig. 3a. *L. infantum* wild-type (1); CDPK1<sup>+/H</sup> (2); and CDPK1<sup>H/P</sup>+CDPK1 at passage 3 (5). **b**, Schematic representation of cloned (in pSP72αZEOα) and chromosomal CDPK1. **c**, Southern blot analysis with genomic DNAs digested with XbaI and HindIII from the *L. infantum* wild-type (1) and recombinant clones of CDPK1<sup>+/H</sup> (2); CDPK1<sup>+/P</sup> (3); CDPK1<sup>H/P</sup> (4); CDPK1<sup>H/P</sup>+CDPK1 from passage 3 (5) and CDPK1<sup>H/P</sup>+CDPK1 from passage 50 (6). The 9.6 kb fragment corresponds to chromosomal copy of CDPK1 while the 1.9 kb or 4.5

kb bands are diagnostics of the episome. Hybridization was performed with a probe covering an internal 480 bp region from the *CDPK1* gene (probe B in panel A). **d**, Similar analysis but with genomic DNA derived from *CDPK1<sup>H/P</sup>+CDPK1* from passage 3 (5); *CDPK1<sup>H/P</sup>+CDPK1* from passage 50 (6); and *CDPK1<sup>+/H</sup>+CDPK1* at passage 3 (7) or passage 25 (8). Hybridization was performed with a probe covering a 400 bp region internal to the zeocin resistance marker (probe C). *H* and *P* refer to the *HYG*- and *PURO*-inactivated alleles, respectively. + refers to the wild-type allele. Source data are provided as a Source Data file.

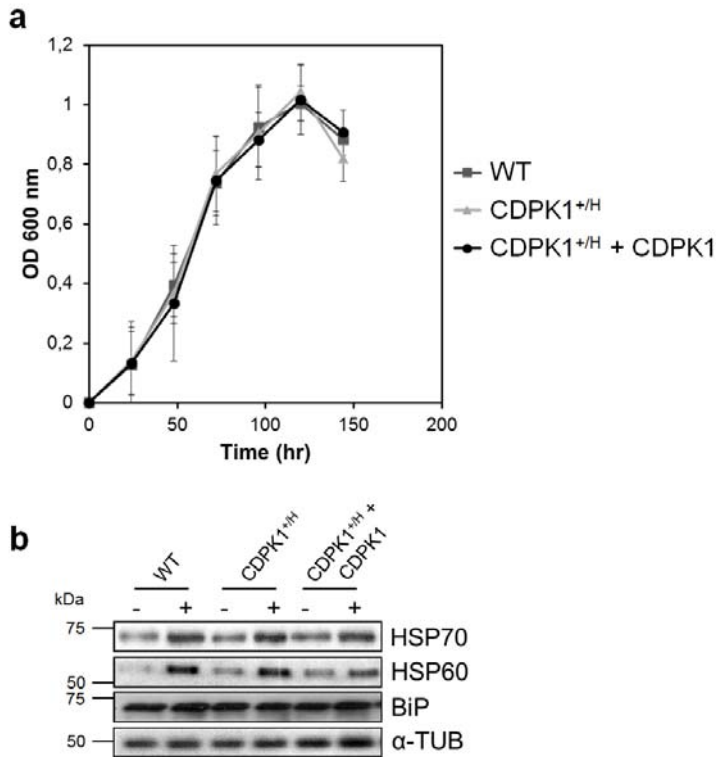

Supplementary Figure 6. **Growth properties and monitoring of stress proteins expression in CDPK1<sup>+/H</sup> cells.** **a.** Growth curves of wild-type, CDPK1<sup>+/H</sup> and CDPK1<sup>+/H</sup> + CDPK1 add-back cells as measured by optical density at 600 nm over time. Data are mean  $\pm$  SEM for n=3 independent biological replicates. Statistical analyses were performed using unpaired t-tests. **b,** Expression of stress proteins in cells grown at room temperature (-) or heat stress (37°C) (+). The quantity of proteins layered in each lane was monitored with an anti-tubulin antibody ( $\alpha$ -TUB). *H* and + refer to the *HYG*-inactivated and wild-type alleles, respectively. Source data are provided as a Source Data file.

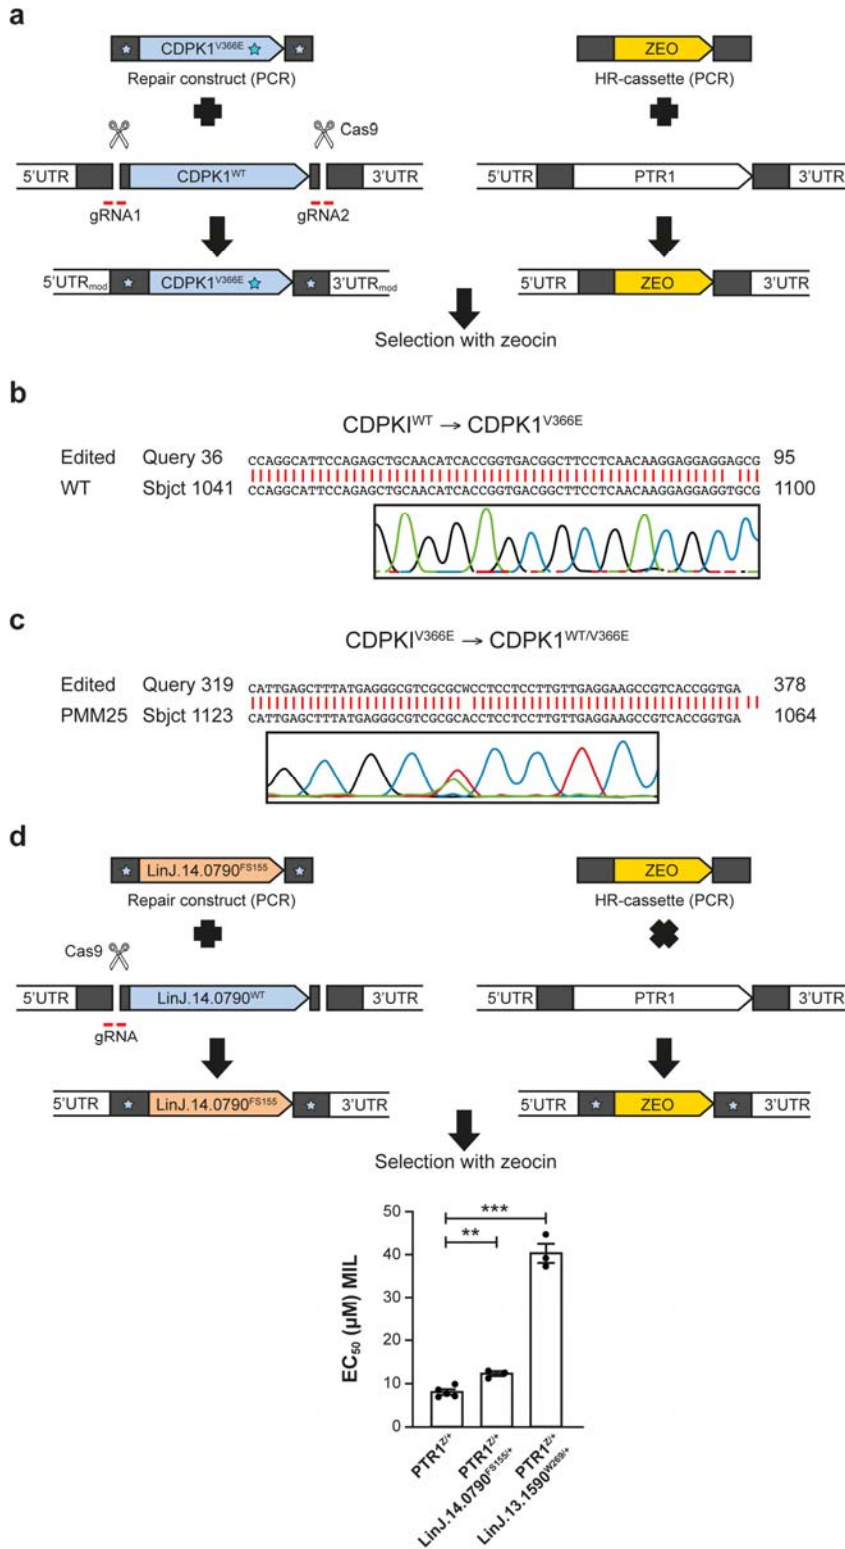

Supplementary Figure 7. **Gene editing using CRISPR-Cas9.** a, A strategy to perform gene editing of *Leishmania CDPK1* was developed using a combination of CRISPR-

Cas9-assisted gene targeting and homologous recombination-based allelic replacement. Two cassettes were prepared. The first cassette is used for repairing the Cas9-targeted site and was amplified using primers specific to the protospacer-adjacent motifs (PAM) for gRNA1 and gRNA2 but in which the PAM site was destroyed. This prevented the repair cassette to be targeted by Cas9. The other cassette was amplified from a construct aiming to knock-out the *PTR1* gene by homologous recombination, using zeocin as a selection marker. The cassettes, along with gRNA-CrRNA hybrids, were co-transfected in *L. infantum* cells expressing Cas9 (*LiCas9*). The cells were selected using zeocin. Editing was confirmed by PCR amplification of the *CDPK1* gene in zeocin-resistant parasites followed by conventional Sanger sequencing. Chromatogram (inset) and sequence alignment confirmed the integration of the mutant allele in wild-type cells (**b**) and of the wild-type allele in mutant cells (**c**). **d**, We used a similar DNA editing approach for *LinJ.14.0790* and *LinJ.13.1590* involved in miltefosine resistance where a PCR fragment containing a frameshift (*LinJ.14.0790* FS155) or a non-sense mutation (*LinJ.13.1590* W269\*) was transfected in a wild-type cell along with the *ZEO*-containing *PTR1*-targeting construct. Zeocin-resistant parasites had *LinJ.14.0790* or *LinJ.13.1590* alleles edited and this increased resistance to miltefosine. Data are mean  $\pm$  SEM for n=5 (*PTR1*<sup>Z+</sup>) and n= 3 (other samples) independent biological replicates. Statistical analyses were performed using unpaired two-tailed t-tests. Z and + refer to the *ZEO*-inactivated and wild-type alleles, respectively. Source data are provided as a Source Data file.

**a CDPK1<sup>V366E</sup>**

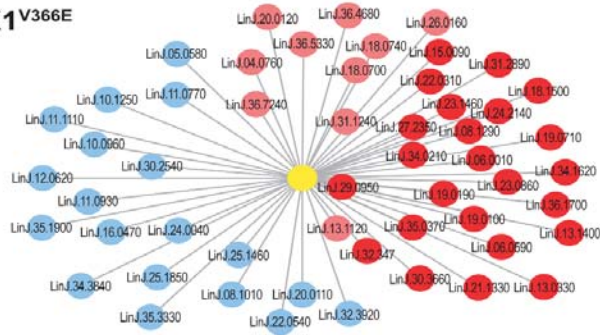

**b CDPK1<sup>K61G</sup>**

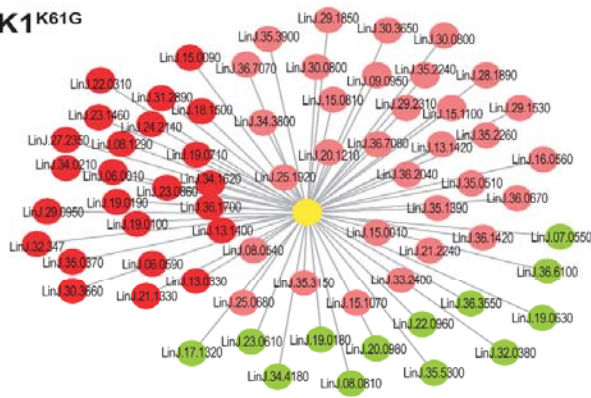

**c CDPK1<sup>V366E</sup>**

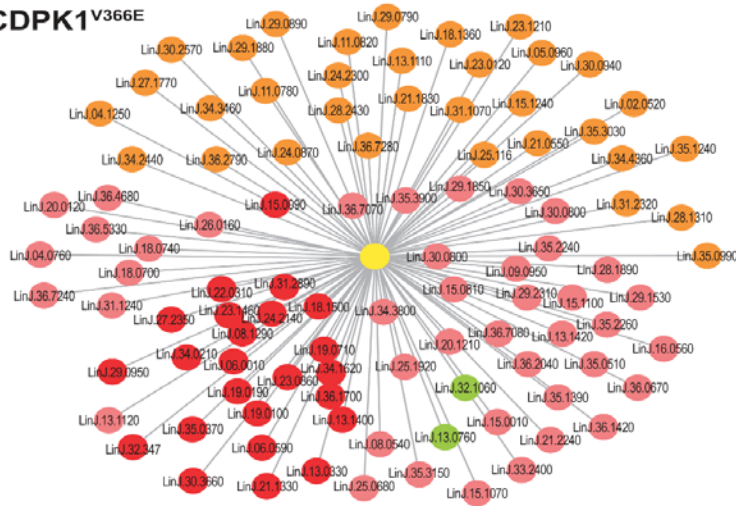

Supplementary Figure 8. **Visualization of predicted interacting partners for CDPK1 versions.** This is an enlarged version of Fig. 5a for facilitating the reading of the gene IDs of the interacting proteins. Nodes inferring specific gene-IDs as retrieved from SAINT analysis (average P >0.8) of IP data for CDPK1-HA, CDPK1<sup>K61G</sup>-HA and CDPK1<sup>V366E</sup>-HA. SAINT analysis was performed using total spectral counts for peptides identified with

<1% FDR. Unique nodes are presented in blue, green and orange for CDPK1-HA (**a**), CDPK1<sup>K61G</sup>-HA (**b**) and CDPK1<sup>V366E</sup>-HA (**c**), respectively. Common proteins are presented in shades of red depending on the level of overlap.

**a**

| SampleID | Gene         | Product                             | Molecular weight | Rational             |
|----------|--------------|-------------------------------------|------------------|----------------------|
| 1        | LinJ.06.0590 | 60S ribosomal protein L23a (rL23a)  | 16336            | IP all               |
| 2        | LinJ.11.1110 | 60S ribosomal protein L28           | 16370            | IP WT                |
| 3        | LinJ.35.0370 | ATP-dependent DEAD-box RNA helicase | 46394            | IP all               |
| 4        | LinJ.34.0210 | ARM56                               | 56085            | IP all; motif        |
| 5        | LinJ.10.0960 | small GTP-binding protein Rab11     | 23402            | IP WT                |
| 6        | LinJ.10.1250 | Ras-related protein RabX1           | 24548            | IP WT; motif         |
| 7        | LinJ.28.2950 | HSP70                               | 71267            | Phospho prot.; motif |
| 8        | LinJ.34.1620 | p25-alpha                           | 16616            | IP all               |

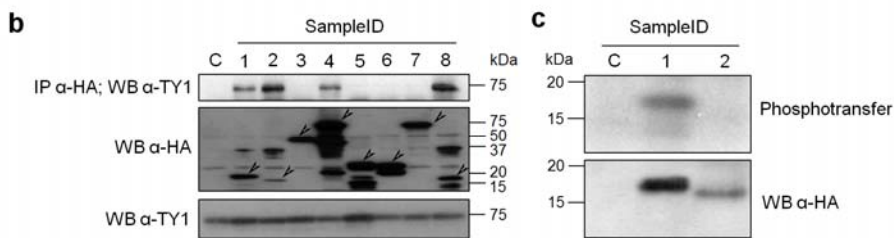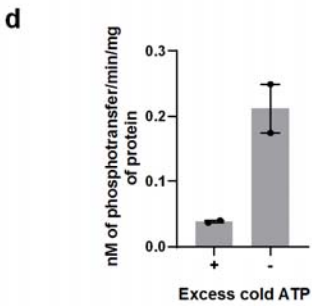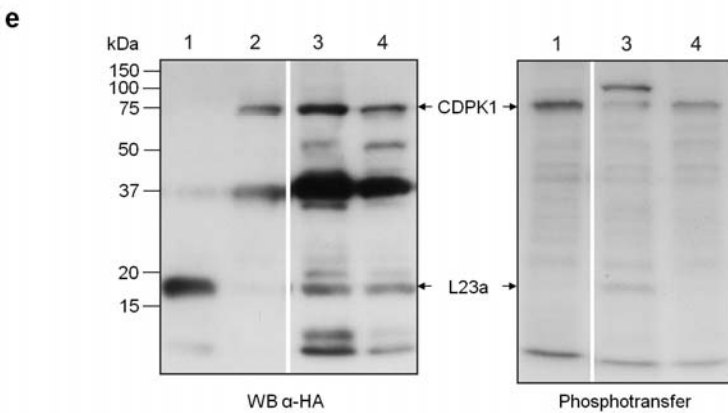

Supplementary Figure 9. **Reciprocal immunoprecipitation of potential partners of CDPK1 and CDPK1 mediated phosphorylation of ribosomal protein L23a.** a, List of



putative CDPK1 partners (prey proteins) assessed by reciprocal immunoprecipitation and rational for their selection. IP all: the protein immunoprecipitated with the three versions of CDPK1 (WT, K61G and V366E in Supplementary Table 5); IP WT: the protein immunoprecipitated only with the wild-type version of CDPK1 (Supplementary Table 5); motif: the protein is predicted to contain an AMPK/CaMK phosphorylation motif; Phospho prot: the protein was previously detected in a phosphoproteome study. **b**, Lysates of cells expressing TY1-CDPK1 and HA-tagged versions of prey proteins (see panel A) were immunoprecipitated with anti-HA antibody followed by western blotting using anti-TY1 antibody for assessing the co-immunoprecipitation of TY1-CDPK1 (upper panel). Expression of HA-tagged versions of the prey proteins (indicated by arrow heads in the middle panel) and of TY1-CDPK1 (lower panel) in each of the lysates was confirmed by western blot using anti-HA and anti-TY1 antibody, respectively. **c**, Immunoprecipitation (using anti-HA) coupled to in vitro kinase assay was performed with *L. infantum* expressing HA-CDPK1 co-transfected with empty vector (C) or a vector expressing HA-LinJ.06.0590 (1) or HA-LinJ.11.1110 (2) (upper panel). Western blot performed with anti-HA antibody on the immunoprecipitates used for the kinase assay confirms the expression of the target proteins (lower panel). **d**, In vitro kinase assay was performed with immunoprecipitates from lysates of *CDPK1<sup>+/-H</sup>* cells expressing HA-CDPK1. Assays were performed in presence (+) or absence (-) of excess cold ATP to confirm active phosphotransfer to the AMARA peptide. AMARA peptide is a minimal substrate for several members of the protein kinases family. It contains the phosphorylation site for AMP-activated Protein Kinase and is employed to measure AMPK-related kinase activity. Results are representative of n=2 biologically independent experiments. **e**,

Immunoprecipitation (using anti-HA) coupled to in vitro kinase assay was performed with *L. infantum* expressing HA-LinJ.06.0590 (L23a) (1), HA-CDPK1 (2), HA-LinJ.06.0590 along with HA-CDPK1 (3), or HA-LinJ.06.0590 (L23a) along with HA-CDPK1<sup>K61G</sup> (4) (left panel). The wild-type version of CDPK1 is required for the phosphorylation of LinJ.06.0590 (L23a) (right panel). The Source data are provided as a Source Data file.

## Supplementary Tables

**Supplementary Table 1.** Colonies growing on plates following mutagens treatment and selection with

MIL and PMM at 5× or 10× their EC<sub>50</sub>.

| Drug <sup>a</sup> | Mutagen <sup>b</sup> | Mutagen conc. <sup>c</sup> | # clones obtained at [drug] (clone IDs) <sup>d</sup> |                      |
|-------------------|----------------------|----------------------------|------------------------------------------------------|----------------------|
|                   |                      |                            | 5× EC <sub>50</sub>                                  | 10× EC <sub>50</sub> |
| <b>MIL</b>        | None                 | None                       | 0                                                    | 0                    |
|                   | EMS                  | 40 mM                      | 7 (MIL 1-7)                                          | 3 (MIL 8-10)         |
|                   | ENU                  | 4 mM                       | 0                                                    | 0                    |
|                   | MMS                  | 0.1 mM                     | 0                                                    | 0                    |
|                   | HPMA                 | 100 mM                     | 6 (MIL 11-16)                                        | 0                    |
| <b>PMM</b>        | None                 | None                       | 0-5 <sup>e</sup>                                     | 0                    |
|                   | EMS                  | 40 mM                      | 40 <sup>e</sup>                                      | 11 (PMM 1-11)        |
|                   | ENU                  | 4 mM                       | 56 <sup>e</sup>                                      | 11 (PMM 12-22)       |
|                   | MMS                  | 0.1 mM                     | 42 <sup>e</sup>                                      | 3 (PMM 23-25)        |
|                   | HPMA                 | 100 mM                     | 0                                                    | 0                    |

<sup>a</sup> MIL, miltefosine; PMM, paromomycin.

<sup>b</sup> EMS, Ethyl methanesulphonate; ENU, Ethylnitrosourea; MMS, Methylmethanesulphonate; HMPA, Hexamethylphosphoramide.

<sup>c</sup> Concentration of mutagen used for chemical mutagenesis of parasites prior to their selection with either MIL or PMM.

<sup>d</sup> The number of clones obtained after plating mutagenized parasites in the presence of MIL or PMM at their 5× EC<sub>50</sub> or 10× EC<sub>50</sub> concentrations.

<sup>e</sup> These clones were not analyzed further.

**Supplementary Table 2.** List of homozygous mutations detected in miltefosine resistant mutants.

| Common in | GeneID       | Product <sup>a</sup>                                                      | Mutant(s)                                 | Pos. in protein | From <sup>b</sup> | To <sup>b</sup> |
|-----------|--------------|---------------------------------------------------------------------------|-------------------------------------------|-----------------|-------------------|-----------------|
| 1         | LinJ.12.0662 | surface antigen protein 2, putative                                       | MIL8                                      | 27              | T                 | K               |
| 1         | LinJ.13.1370 | mitochondrial DFS polymerase I protein D, putative                        | MIL7                                      | 643             | G                 | D               |
| 1         | LinJ.13.1430 | protein Associated with Differentiation, putative                         | MIL9                                      | 77              | G                 | E               |
| 1         | LinJ.13.1590 | miltefosine transporter*                                                  | MIL7                                      | 269             | W                 | *               |
| 1         | LinJ.14.1180 | kinesin K39, putative                                                     | MIL7                                      | 2153            | E                 | D               |
| 1         | LinJ.14.1180 | kinesin K39, putative                                                     | MIL9                                      | 2156            | K                 | R               |
| 1         | LinJ.14.1180 | kinesin K39, putative                                                     | MIL9                                      | 2158            | A                 | T               |
| 1         | LinJ.15.1540 | cAMP specific phosphodiesterase, putative                                 | MIL8                                      | 186             | T                 | I               |
| 1         | LinJ.17.0360 | hypothetical protein, conserved                                           | MIL9                                      | 341             | A                 | V               |
| 1         | LinJ.22.1570 | hypothetical protein                                                      | MIL7                                      | 207             | M                 | I               |
| 1         | LinJ.33.2140 | hypothetical protein, unknown function                                    | MIL9                                      | 67              | WT                | FS              |
| 1         | LinJ.34.0360 | ATPase family associated with various cellular activities (AAA), putative | MIL8                                      | 124             | R                 | G               |
| 1         | LinJ.34.0710 | flagellar attachment zone protein, putative                               | MIL1                                      | 240             | WT                | FS              |
| 1         | LinJ.35.4610 | uncharacterized conserved protein, putative                               | MIL12                                     | 142             | WT                | FS              |
| 1         | LinJ.36.0050 | PUF1, putative                                                            | MIL10                                     | 278             | H                 | R               |
| 1         | LinJ.36.6220 | glycerophosphoryl diester phosphodiesterase, putative*                    | MIL10                                     | 46              | WT                | FS              |
| 2         | LinJ.14.1180 | kinesin K39, putative                                                     | MIL7,9                                    | 2162            | R                 | Q               |
| 2         | LinJ.35.0520 | proteophosphoglycan ppg4                                                  | MIL7, 8                                   | 1091            | L                 | V               |
| 2         | LinJ.35.0550 | proteophosphoglycan ppg1                                                  | MIL1, 2                                   | 203             | F                 | I               |
| 3         | LinJ.27.0250 | kinetoplast-associated protein-like protein (fragment)                    | MIL1, 4, 7                                | 656             | WT                | FS              |
| 4         | LinJ.14.0790 | fatty acid elongase, putative*                                            | MIL6, 7, 8, 10                            | 155             | WT                | FS              |
| 4         | LinJ.30.1310 | pyridoxal kinase, putative                                                | MIL1, 2, 3, 4                             | 197             | H                 | D               |
| 5         | LinJ.20.0750 | hypothetical protein, conserved                                           | MIL6, 7, 9, 10, 15                        | 1042            | WT                | FS              |
| 7         | LinJ.12.0670 | surface antigen protein 2, putative                                       | MIL1, 5, 6, 7, 9, 10, 12                  | 403             | WT                | FS              |
| 10        | LinJ.15.0500 | hypothetical protein                                                      | MIL1, 2, 3, 4, 5, 6, 7, 8, 9, 10          | 2058            | WT                | FS              |
| 11        | LinJ.20.1200 | hypothetical protein                                                      | MIL6, 7, 8, 9, 10, 11, 12, 13, 14, 15, 16 | 581             | WT                | FS              |

<sup>a</sup> Genes tested by episomal expression of the wild-type gene in mutants are marked with an asterisk.

<sup>b</sup> Amino acids alterations are indicated for single-nucleotide substitutions. Indels lead to frameshift (FS) mutations.

**Supplementary Table 3.** List of homozygous mutations detected in the various paromomycin resistant mutants

| Common in | GeneID       | Product <sup>a</sup>                                         | Mutant(s)                | Pos. in protein | From <sup>b</sup> | To <sup>b</sup> |
|-----------|--------------|--------------------------------------------------------------|--------------------------|-----------------|-------------------|-----------------|
| 1         | LinJ.16.1320 | hypothetical protein, conserved                              | PMM3                     | 2187            | W                 | *               |
| 1         | LinJ.11.1260 | ATP-binding cassette protein subfamily A, member 5, putative | PMM15                    | 66              | I                 | V               |
| 1         | LinJ.27.1660 | tubulin cofactor C domain-containing protein 1, putative *   | PMM18                    | 341             | L                 | F               |
| 1         | LinJ.33.1810 | protein kinase, putative (CDPK1)*                            | PMM25                    | 366             | V                 | E               |
| 3         | LinJ.15.0500 | hypothetical protein                                         | PMM5, 23, 24             | 2058            | WT                | FS              |
| 5         | LinJ.27.0250 | kinetoplast-associated protein-like protein (fragment)       | PMM3,6, 17, 22, 23,      | 656             | WT                | FS              |
| 6         | LinJ.12.0670 | surface antigen protein 2, putative                          | PMM7, 12, 15, 16, 20, 23 | 403             | WT                | FS              |

<sup>a</sup> Genes tested by episomal expression of the wild-type gene in mutants are marked with asterisk.

<sup>b</sup> Amino acids alterations are indicated for single-nucleotide substitutions. Indels lead to frameshift (FS) mutations. Asterisks refer to stop codons.

**Supplementary Table 4.** Genes with recurrent 5' or 3'UTR mutations among mutants.<sup>a</sup>

| Drug       | Mutants <sup>b</sup> |             |              | Gene         | Mutation <sup>c</sup> | Type <sup>d</sup>    | Function                                   | Expression (Mutant/WT) <sup>e</sup> | Fold change susceptibility <sup>f</sup> |
|------------|----------------------|-------------|--------------|--------------|-----------------------|----------------------|--------------------------------------------|-------------------------------------|-----------------------------------------|
| 5'UTR      | <b>MIL</b>           | <b>MIL6</b> | MIL9         | LinJ.07.0420 | ΔG at -73             | M/M                  | homoserine dehydrogenase like protein      | 0.80 ± 0.27                         | nd                                      |
|            |                      | MIL7        | MIL10        |              |                       |                      |                                            |                                     |                                         |
|            |                      | MIL8        | MIL13        |              |                       |                      |                                            |                                     |                                         |
|            | <b>MIL</b>           | MIL1        | MIL7         | LinJ.14.0340 | Insert. C at -303     | M/M                  | inositol polyphosphate kinase like protein | 1.67 ± 0.56*                        | 1.1× (n=3) <sup>ns</sup>                |
|            |                      | MIL2        | MIL8         |              |                       |                      |                                            |                                     |                                         |
|            |                      | MIL4        | MIL9         |              |                       |                      |                                            |                                     |                                         |
|            | <b>MIL</b>           | MIL5        | MIL10        | LinJ.36.6160 | Insert. T at -465     | +/M                  | choline-ethanolamine phosphotransferase    | 0.84 ± 0.30                         | nd                                      |
|            |                      | MIL6        | MIL9         |              |                       |                      |                                            |                                     |                                         |
|            |                      | MIL7        | MIL11        |              |                       |                      |                                            |                                     |                                         |
| 5'UTR      | <b>PMM</b>           | MIL8        | MIL12        | LinJ.10.1100 | ΔAC at -314           | M/M                  | carrier protein                            | 0.81 ± 0.26                         | nd                                      |
|            |                      | MIL15       | MIL16        |              |                       |                      |                                            |                                     |                                         |
|            |                      | MIL13       | <b>MIL15</b> |              |                       |                      |                                            |                                     |                                         |
|            |                      | PMM1        | PMM10        |              |                       |                      |                                            |                                     |                                         |
|            |                      | PMM2        | PMM11        |              |                       |                      |                                            |                                     |                                         |
|            |                      | PMM3        | PMM12        |              |                       |                      |                                            |                                     |                                         |
|            |                      | PMM4        | PMM13        |              |                       |                      |                                            |                                     |                                         |
|            |                      | PMM6        | PMM14        |              |                       |                      |                                            |                                     |                                         |
|            |                      | PMM7        | PMM15        |              |                       |                      |                                            |                                     |                                         |
| PMM8       | PMM16                |             |              |              |                       |                      |                                            |                                     |                                         |
| 5'UTR      | <b>PMM</b>           | PMM9        | PMM17        | LinJ.29.1500 | ΔAT at -203           | M/M                  | RNA binding protein, putative              | 1.04 ± 0.33                         | nd                                      |
|            |                      | PMM18       | PMM24        |              |                       |                      |                                            |                                     |                                         |
|            |                      | PMM20       | PMM21        |              |                       |                      |                                            |                                     |                                         |
|            |                      | PMM22       | PMM23        |              |                       |                      |                                            |                                     |                                         |
|            |                      | PMM23       | PMM24        |              |                       |                      |                                            |                                     |                                         |
|            |                      | PMM11       | PMM12        |              |                       |                      |                                            |                                     |                                         |
|            |                      | PMM12       | PMM13        |              |                       |                      |                                            |                                     |                                         |
|            |                      | PMM4        | PMM15        |              |                       |                      |                                            |                                     |                                         |
|            |                      | PMM8        | PMM16        |              |                       |                      |                                            |                                     |                                         |
| PMM9       | <b>PMM18</b>         |             |              |              |                       |                      |                                            |                                     |                                         |
| 3'UTR      | <b>MIL</b>           | PMM2        | PMM13        | LinJ.35.0790 | Insert. GC at -325    | +/M                  | rRNA dimethyltransferase, putative         | 0.71 ± 0.24*                        | 1.0× (n=3) <sup>ns</sup>                |
|            |                      | PMM7        | PMM16        |              |                       |                      |                                            |                                     |                                         |
|            |                      | PMM10       | PMM20        |              |                       |                      |                                            |                                     |                                         |
|            | <b>MIL</b>           | <b>MIL6</b> | MIL8         | LinJ.09.0080 | ΔC or ΔCC at +482     | M/M                  | RNA binding protein, putative              | 0.51 ± 0.12**                       | nd                                      |
|            |                      | MIL7        | MIL9         |              |                       |                      |                                            |                                     |                                         |
|            |                      | MIL8        | MIL11        |              |                       |                      |                                            |                                     |                                         |
|            | <b>MIL</b>           | <b>MIL6</b> | MIL9         | LinJ.34.0690 | Insert. A at +329     | M/M                  | ABCC8 transporter                          | 0.42 ± 0.15***                      | 1.6× (n=3)***                           |
|            |                      | MIL7        | MIL10        |              |                       |                      |                                            |                                     |                                         |
|            |                      | MIL8        | MIL11        |              |                       |                      |                                            |                                     |                                         |
| <b>PMM</b> | PMM1                 | PMM9        | LinJ.14.0080 | ΔG at +544   | M/M                   | Hypothetical protein | 0.66 ± 0.20*                               | 1.0× (n=6) <sup>ns</sup>            |                                         |
|            | PMM2                 | PMM10       |              |              |                       |                      |                                            |                                     |                                         |

---

|      |       |              |
|------|-------|--------------|
| PMM3 | PMM11 | PMM20        |
| PMM4 | PMM12 | PMM21        |
| PMM5 | PMM13 | PMM22        |
| PMM6 | PMM14 | PMM23        |
| PMM7 | PMM15 | <b>PMM24</b> |
| PMM8 | PMM16 | PMM25        |

---

<sup>a</sup> Mutations were searched within the 650 nucleotides upstream of the ATG of the genes (5'UTR) or the 750 nucleotides downstream of their stop codon (3'UTR). Genes with 5' or 3' UTRs mutations in multiple mutants (not necessarily at the exact same position) were considered as mutated in a recurrent fashion.

<sup>b</sup> The names of the mutants in which mutations were detected in the UTR of the gene are indicated. For each gene, the mutant used for functional characterization is indicated in bold.

<sup>c</sup> The mutation detected in the mutant used for functional characterization (i.e. mutant in bold in column 3). Δ, deletion; Insert., Insertion. For 5'UTRs, the nucleotide positions upstream (-) of the ATG are indicated. For 3'UTRs, the nucleotide positions downstream (+) of the stop codon are indicated.

<sup>d</sup> M/M, homozygous mutation; +/M, heterozygous mutation.

<sup>e</sup> Gene expression was compared between the mutants and the parental wild type (WT) clone by qRT-PCR. The mutant/WT expression ratios are shown. \*,  $p < 0.05$ ; \*\*,  $p < 0.01$ ; \*\*\*,  $p < 0.001$ .

<sup>f</sup> Genes with a significantly downregulated expression in the mutant were transfected in the mutants and we monitored for drug resensitization among transfectants. Genes with a significantly upregulated expression in the mutant were transfected in wild-type *L. infantum* and we monitored for increased drug resistance among transfectants. Statistical analyses were performed using



unpaired two-tailed t-tests. \*\*\*,  $p < 0.001$ ; ns, not significant. nd, not done. The increase in gene expression following transfection of wild-type cells with an episome coding for LinJ.14.0340 was  $8.48 \pm 3.64$  fold ( $p$ -value 0.0116). The increase in gene expression following transfection of mutants with episomes coding for LinJ.14.0080 (in PMM24), LinJ.34.0690 (in MIL6) and LinJ.35.0790 (in PMM24) was  $2.55 \pm 1.20$  fold ( $p = 0.0005$ ),  $2.34 \pm 1.01$  fold ( $p = 0.0042$ ) and  $3.33 \pm 1.53$  fold ( $p = 0.0070$ ), respectively.

**Supplementary Table 5.** List of proteins from the Venn diagram of Fig 4b. The 24 Proteins detected in immunoprecipitates from all three versions of CDPK1 (WT, K61G and V366E) are indicated on the right, the 11 proteins detected specifically in immunoprecipitates from the WT and V366E versions are indicated in the middle and the 18 proteins found exclusively with the wild-type version of CDPK1 are indicated on the left.

| Proteins detected exclusively in immunoprecipitates from the WT CDPK1 |              |                                                                    | Proteins detected in immunoprecipitates from the WT and V366E versions of CDPK1 |              |                                                                     | Proteins detected in immunoprecipitates from the WT, K61G and V366E versions of CDPK1 |              |                                                       |
|-----------------------------------------------------------------------|--------------|--------------------------------------------------------------------|---------------------------------------------------------------------------------|--------------|---------------------------------------------------------------------|---------------------------------------------------------------------------------------|--------------|-------------------------------------------------------|
| Total                                                                 | GeneID       | Product description                                                | Total                                                                           | GeneID       | Product description                                                 | Total                                                                                 | GeneID       | Product description                                   |
| 18                                                                    | LinJ.24.0040 | 60S ribosomal protein L17, putative                                | 11                                                                              | LinJ.13.1120 | 40S ribosomal protein S4, putative                                  | 24                                                                                    | LinJ.22.0310 | 40S ribosomal protein S15, putative                   |
|                                                                       | LinJ.35.1900 | 60S ribosomal protein L36, putative                                |                                                                                 | LinJ.11.0770 | 40S ribosomal protein S21, putative                                 |                                                                                       | LinJ.06.0590 | 60S ribosomal protein L23a, putative                  |
|                                                                       | LinJ.35.3330 | 60S ribosomal subunit protein L31, putative                        |                                                                                 | LinJ.26.0160 | 60S ribosomal protein L7, putative                                  |                                                                                       | LinJ.24.2140 | 60S ribosomal protein L26, putative                   |
|                                                                       | LinJ.16.0470 | 60S ribosomal protein L21, putative                                |                                                                                 | LinJ.18.0740 | Elongation factor Tu, mitochondrial, putative                       |                                                                                       | LinJ.35.0370 | ATP-dependent DEAD-box RNA helicase, putative         |
|                                                                       | LinJ.11.1110 | 60S ribosomal protein L28, putative                                |                                                                                 | LinJ.04.0760 | nascent polypeptide associated complex subunit-like protein, copy 2 |                                                                                       | LinJ.21.1330 | T-complex protein 1, delta subunit, putative          |
|                                                                       | LinJ.22.0540 | prefoldin 5-like protein                                           |                                                                                 | LinJ.36.7240 | T-complex protein 1, theta subunit, putative                        |                                                                                       | LinJ.23.1460 | T-complex protein 1, gamma subunit, putative          |
|                                                                       | LinJ.30.2540 | heat shock 70-related protein 1, mitochondrial precursor, putative |                                                                                 | LinJ.18.0700 | citrate synthase, putative                                          |                                                                                       | LinJ.13.1400 | chaperonin TCP20, putative                            |
|                                                                       | LinJ.10.1250 | Ras-related protein RabX1, putative                                |                                                                                 | LinJ.20.0120 | phosphoglycerate kinase B, cytosolic                                |                                                                                       | LinJ.27.2350 | heat shock protein DNAJ, putative                     |
|                                                                       | LinJ.10.0960 | small GTP-binding protein Rab11, putative                          |                                                                                 | LinJ.31.1240 | Pyrophosphate-energized vacuolar membrane proton pump 1, putative   |                                                                                       | LinJ.32.3470 | chaperonin alpha subunit, putative                    |
|                                                                       | LinJ.25.1460 | GTP-binding protein, putative                                      |                                                                                 | LinJ.36.4680 | hypothetical protein, conserved LinJ.36.4680                        |                                                                                       | LinJ.15.0090 | ATP-dependent protease ATPase subunit HslU1, putative |
|                                                                       | LinJ.32.3920 | kinetoplast-associated protein p18-2, putative                     |                                                                                 | LinJ.36.5330 | hypothetical protein, conserved LinJ.36.5330                        |                                                                                       | LinJ.31.2890 | ADP-ribosylation factor, putative                     |
|                                                                       | LinJ.12.0620 | cytochrome oxidase subunit IV, putative                            |                                                                                 |              |                                                                     |                                                                                       | LinJ.29.0950 | ADP-ribosylation factor-like protein 3A, putative     |
|                                                                       | LinJ.25.1850 | 3-oxo-5-alpha-steroid 4-dehydrogenase, putative                    |                                                                                 |              |                                                                     |                                                                                       | LinJ.36.1700 | clathrin heavy chain, putative                        |
|                                                                       | LinJ.20.0110 | phosphoglycerate kinase C, glycosomal                              |                                                                                 |              |                                                                     |                                                                                       | LinJ.34.1620 | p25-alpha, putative                                   |
|                                                                       | LinJ.05.0580 | hypothetical protein, conserved LinJ.05.0580                       |                                                                                 |              |                                                                     |                                                                                       | LinJ.18.1500 | P-type H <sup>+</sup> -ATPase, putative               |
|                                                                       | LinJ.08.1010 | hypothetical protein, conserved LinJ.08.1010                       |                                                                                 |              |                                                                     |                                                                                       | LinJ.30.3660 | ATP synthase, epsilon chain, putative                 |
|                                                                       | LinJ.11.0930 | hypothetical protein, conserved LinJ.11.0930                       |                                                                                 |              |                                                                     |                                                                                       | LinJ.19.0190 | ADP/ATP translocase 1, putative                       |
|                                                                       | LinJ.34.3840 | hypothetical protein, conserved LinJ.34.3840                       |                                                                                 |              |                                                                     |                                                                                       | LinJ.06.0010 | histone H4                                            |
|                                                                       |              |                                                                    |                                                                                 |              |                                                                     |                                                                                       | LinJ.19.0710 | glycosomal malate dehydrogenase                       |
|                                                                       |              |                                                                    |                                                                                 |              |                                                                     |                                                                                       | LinJ.23.0860 | 3-ketoacyl-CoA thiolase, putative                     |
|                                                                       |              |                                                                    |                                                                                 |              |                                                                     |                                                                                       | LinJ.34.0210 | Antimony resistance marker of 56 kDa                  |
|                                                                       |              |                                                                    |                                                                                 |              |                                                                     |                                                                                       | LinJ.13.0330 | alpha tubulin                                         |
|                                                                       |              |                                                                    |                                                                                 |              |                                                                     |                                                                                       | LinJ.08.1290 | beta tubulin                                          |
|                                                                       |              |                                                                    |                                                                                 |              |                                                                     |                                                                                       | LinJ.19.0100 | hypothetical protein, conserved LinJ.19.0100          |

**Supplementary Table 6.** Predicted targets for CDPK1. 206 proteins retrieved from kinase assay-gel and detected by LC-MS/MS were analyzed for AMPK/CaMK phosphorylation motifs by KinasePhos2.0. Proteins predicted with high confidence (SVMscore > 0.8) are shown. Proteins previously reported to be phosphorylated are highlighted in bold. Proteins that have been identified by CDPK1 IP (see Supplementary Table 5) are indicated by an asterisk.

| <b>Gene ID</b>      | <b>Product Description</b>                        |
|---------------------|---------------------------------------------------|
| <b>LinJ.15.1010</b> | <b>40S ribosomal protein S3, putative</b>         |
| LinJ.32.3320        | ribosomal protein L3, putative                    |
| <b>LinJ.18.1350</b> | <b>heat shock protein 110, putative</b>           |
| <b>LinJ.26.1220</b> | <b>heat shock protein 70-related protein</b>      |
| <b>LinJ.28.2960</b> | <b>heat-shock protein hsp70, putative</b>         |
| LinJ.26.0630        | protein disulfide isomerase, putative             |
| LinJ.24.2220        | ubiquitin-conjugating enzyme E2, putative         |
| LinJ.10.1250        | Ras-related protein RabX1, putative*              |
| LinJ.19.0190        | ADP/ATP translocase 1, putative*                  |
| LinJ.19.0970        | 4-coumarate:coa ligase-like protein               |
| LinJ.23.0120        | GDP-mannose pyrophosphorylase                     |
| LinJ.24.2200        | 3-hydroxy-3-methylglutaryl-CoA synthase, putative |
| LinJ.30.0120        | alkyldihydroxyacetonephosphate synthase           |
| LinJ.36.4100        | S-adenosylhomocysteine hydrolase                  |
| LinJ.34.0210        | Antimony resistance marker of 56 kDa*             |
| <b>LinJ.11.0930</b> | <b>hypothetical protein, conserved*</b>           |
