# Supplementary material for: Coupling chemical mutagenesis to next generation sequencing for the identification of drug resistance mutations in Leishmania
Source: PubMed Central journal article supplement (PMC6901541; doi:10.1038/s41467-019-13344-6), 2019-12-09
Supplement: 41467_2019_13344_MOESM4_ESM.pdf [file 41467_2019_13344_MOESM4_ESM.pdf]

## **Description of Additional Supplementary Files**

File Name: Supplementary Data 1

Description: contains the list of genes for which we detected single nucleotide variants in at least two of our miltefosine-resistant mutants.

File Name: Supplementary Data 2

Description: contains the list of genes for which we detected single nucleotide variants in at least two of our paromomycin-resistant mutants.

File Name: Supplementary Data 3

Description: contains data pertaining to the interactome of the CDPK1 protein kinase and its variants.

File Name: Supplementary Data 4

Description: contains data pertaining to the identification of proteins from the kinase assay performed with immunoprecipitated CDPK1.

File Name: Supplementary Data 5

Description: is listing the PCR primers used in this study.
